# Supplementary material
Source: PubMed Central journal article supplement (PMC5654549)
Supplement: NIHMS878812-supplement-Suppl__Table_3.pdf [file NIHMS878812-supplement-Suppl__Table_3.pdf]

**Table 1 Data collection and refinement statistics**

|                                                     | HRUclD <sup>LD</sup><br>(5NWP) | UclD <sup>LD</sup><br>(5VQ5)                  |
|-----------------------------------------------------|--------------------------------|-----------------------------------------------|
| <b>Data collection</b>                              |                                |                                               |
| Space group                                         | P2 <sub>1</sub>                | P2 <sub>1</sub> 2 <sub>1</sub> 2 <sub>1</sub> |
| Cell dimensions                                     |                                |                                               |
| <i>a, b, c</i> (Å)                                  | 31.0, 91.9, 64.9               | 39.0, 58.6, 175.1                             |
| $\alpha, \beta, \gamma$ (°)                         | 90.0, 96.5, 90.0               | 90.0, 90.0, 90.0                              |
| Resolution (Å) <sup>a</sup>                         | 91.87 – 1.05 (1.11-<br>1.05)   | 55.60-1.6 (1.66-<br>1.60)                     |
| <i>R</i> <sub>merge</sub> <sup>a</sup>              | 0.079 (0.336)                  | 0.05 (0.43)                                   |
| <i>I</i> / $\sigma$ ( <i>I</i> ) <sup>a</sup>       | 11.9 (2.1)                     | 17.68 (1.43)                                  |
| <i>CC</i> <sub>1/2</sub> <sup>a</sup>               | 99.6 (86.0)                    | 0.998 (0.659)                                 |
| Completeness (%) <sup>a</sup>                       | 88.6 (43.8)                    | 99.97 (99.98)                                 |
| Redundancy <sup>a</sup>                             | 5.0 (2.0)                      | 2.0 (2.0)                                     |
| <b>Refinement</b>                                   |                                |                                               |
| Resolution (Å)                                      | 91.87 - 1.05                   | 55.60 - 1.60                                  |
| No. reflections                                     | 144393                         | 108142                                        |
| <i>R</i> <sub>work</sub> / <i>R</i> <sub>free</sub> | 0.118 / 0.143                  | 0.172 / 0.218                                 |
| No. atoms                                           | 6890                           | 3289                                          |
| Protein                                             | 6223                           | 2804                                          |
| Iodide                                              | /                              | 6                                             |
| Sulphate                                            | 1                              | /                                             |
| Water                                               | 662                            | 479                                           |
| <i>B</i> factors                                    |                                |                                               |
| Protein                                             | 10.7                           | 22.4                                          |
| Iodide                                              | /                              | 62.6                                          |
| Sulphate                                            | 11.0                           | /                                             |
| Water                                               | 23.9                           | 36.2                                          |
| R.m.s. deviations                                   |                                |                                               |
| Bond lengths (Å)                                    | 0.028                          | 0.002                                         |
| Bond angles (°)                                     | 2.281                          | 0.58                                          |

Number of crystals for each structure should be noted in footnote.

<sup>a</sup> Values in parentheses are for highest-resolution shell.
